# Supplementary material for: Respiration of Microbiota-Derived 1,2-propanediol Drives Salmonella Expansion during Colitis
Source: PubMed Central journal article supplement (PMC5215881; doi:10.1371/journal.ppat.1006129), 2017-01-05
Supplement: ppat.1006129.s001.pdf [file ppat.1006129.s001.pdf]

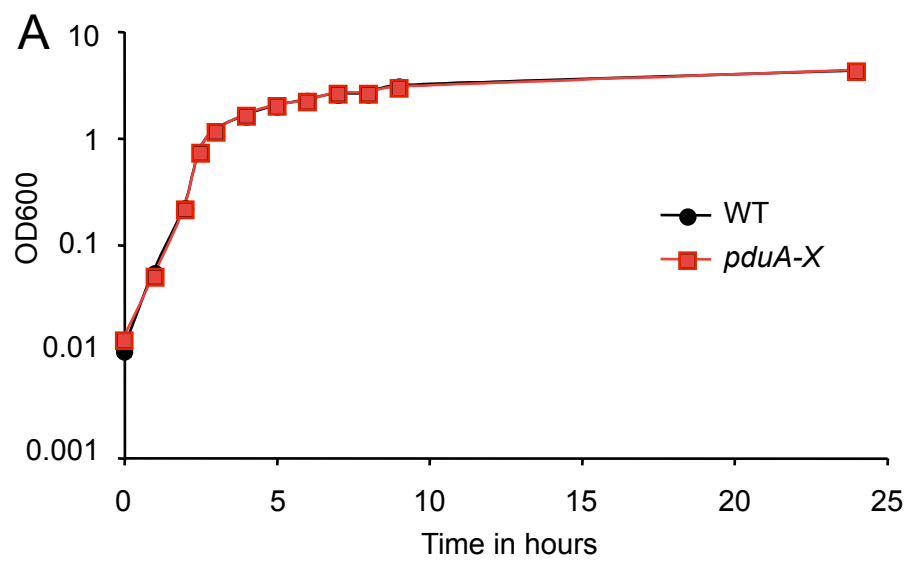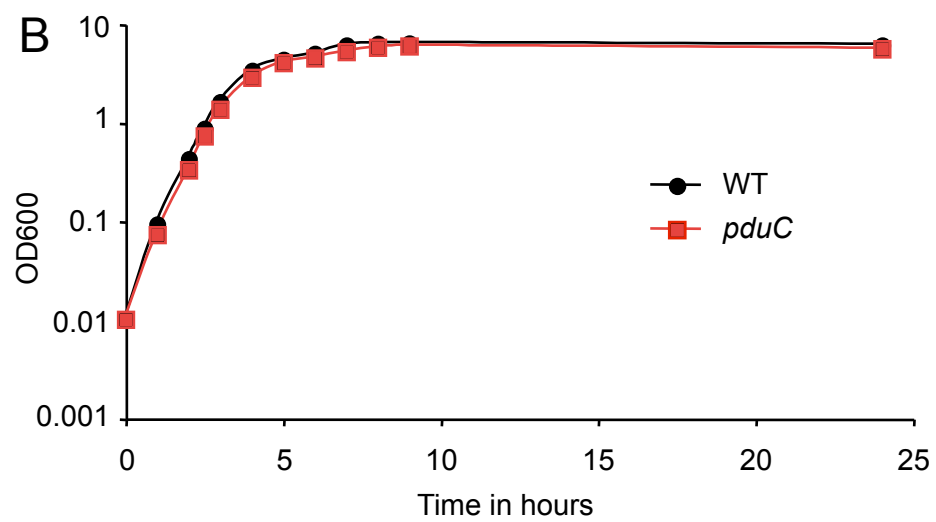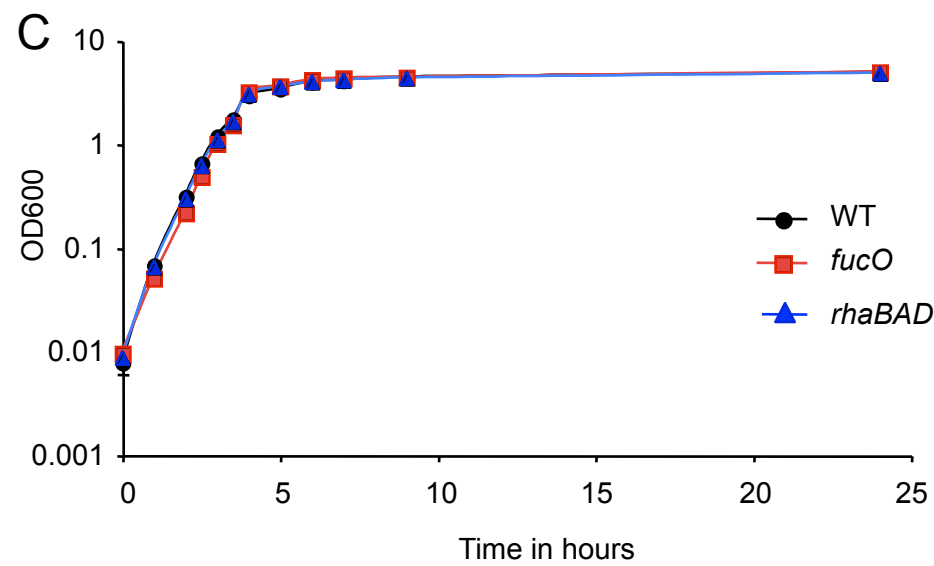

Fig. S1
