# Supplementary material for: Respiration of Microbiota-Derived 1,2-propanediol Drives Salmonella Expansion during Colitis
Source: PubMed Central journal article supplement (PMC5215881; doi:10.1371/journal.ppat.1006129), 2017-01-05
Supplement: ppat.1006129.s004.pdf [file ppat.1006129.s004.pdf]

**A** Scoring criteria for blinded examination of H&E stained sections from the cecum

| Score | Submucosal edema   | Epithelial damage | Exudate               | PMN infiltration* | Mononuclear cell infiltration** |
|-------|--------------------|-------------------|-----------------------|-------------------|---------------------------------|
| 0     | No changes         | No changes        | No changes            | No changes (0-5)  | No changes (0-5)                |
| 1     | Detectable (<10%)  | Desquamation      | Slight accumulation   | 6-20              | 5-10                            |
| 2     | Mild (10%-20%)     | Mild erosion      | Mild accumulation     | 21-60             | 10-20                           |
| 3     | Moderate (20%-40%) | Marked erosion    | Moderate accumulation | 60-100            | 20-40                           |
| 4     | Marked (>40%)      | Ulceration        | Marked accumulation   | >100              | >40                             |

\* PMN, polymorphonuclear cells

\*\* Number of cells per high power microscopic field

**B** Histopathology scoring scheme

| Total score | Description           |
|-------------|-----------------------|
| >8          | Severe inflammation   |
| 6-8         | Moderate inflammation |
| 3-5         | Mild inflammation     |
| 0-2         | normal                |
